# Supplementary material
Source: ML conference proceedings conference paper supplement (https://proceedings.neurips.cc/paper_files/paper/2021/hash/51a6ce0252d8fa6e913524bdce8db490-Abstract.html)
Supplement: Supplementary file 1 [file 51a6ce0252d8fa6e913524bdce8db490-Supplemental.zip]

Archive with 7 entries (6 files):
- Supplementary/
- Supplementary/.DS_Store
- __MACOSX/Supplementary/._.DS_Store
- Supplementary/Appendix.pdf
- __MACOSX/Supplementary/._Appendix.pdf
- Supplementary/Fullpaper.pdf
- __MACOSX/Supplementary/._Fullpaper.pdf
